# Supplementary material for: Incomplete Lineage Sorting and Hybridization Statistics for Large-Scale Retroposon Insertion Data
Source: PubMed Central journal article supplement (PMC4788455; doi:10.1371/journal.pcbi.1004812), 2016-03-11
Supplement: pcbi.1004812.s002.pdf [file pcbi.1004812.s002.pdf]

## Values of $Z_\alpha$ for different levels of significance $\alpha$ .

---

**Table S1.** Values of  $Z_\alpha$  for different levels of significance  $\alpha$ .

| $\alpha$   | 0.005 | 0.01  | 0.025 | 0.05  |
|------------|-------|-------|-------|-------|
| $Z_\alpha$ | 2.576 | 2.326 | 1.960 | 1.645 |
