# Supplementary material for: Incomplete Lineage Sorting and Hybridization Statistics for Large-Scale Retroposon Insertion Data
Source: PubMed Central journal article supplement (PMC4788455; doi:10.1371/journal.pcbi.1004812), 2016-03-11
Supplement: pcbi.1004812.s003.pdf [file pcbi.1004812.s003.pdf]

## Tables of critical values for one-directional and unbiased searches

### Testing: one-directional search

To determine if the number of phylogenetically informative markers on a given branch is sufficient to provide significant support for one hypothesis or another, the evaluation of the results of a biased, one-directional search using this table (Table S2) includes the following steps: (1) calculating the sum of the number of phylogenetically informative markers supporting both hypotheses ( $Y_1 + Y_2$ ), (2) finding the corresponding line in the table in the first column, and (3) comparing the larger value to the critical value in the corresponding column. When the number of markers is greater than the critical value,  $H_0$  must be rejected, and thus  $H_1$  can be accepted with the corresponding level of significance.

**Table S2. Critical numbers of markers for testing one-directional screening results**

| $Y_1+Y_2$ | critical $Y_1$ | $\alpha<5\%$ | 5% border | critical $Y_1$ | $\alpha<1\%$ | 1% border |
|-----------|----------------|--------------|-----------|----------------|--------------|-----------|
| 5         | 5              | 0.0312       | 4.8       |                |              |           |
| 6         | 6              | 0.0156       | 5.5       |                |              |           |
| 7         | 7              | 0.0078       | 6.2       | 7              | 0.0078       | 7.1       |
| 8         | 7              | 0.0352       | 6.8       | 8              | 0.0039       | 7.8       |
| 9         | 8              | 0.0195       | 7.5       | 9              | 0.0020       | 8.5       |
| 10        | 9              | 0.0107       | 8.1       | 10             | 0.0010       | 9.2       |
| 11        | 9              | 0.0327       | 8.7       | 10             | 0.0059       | 9.9       |
| 12        | 10             | 0.0193       | 9.3       | 11             | 0.0032       | 10.5      |
| 13        | 10             | 0.0461       | 10.0      | 12             | 0.0017       | 11.2      |
| 14        | 11             | 0.0287       | 10.6      | 12             | 0.0065       | 11.9      |
| 15        | 12             | 0.0176       | 11.2      | 13             | 0.0037       | 12.5      |
| 16        | 12             | 0.0384       | 11.8      | 14             | 0.0021       | 13.2      |
| 17        | 13             | 0.0245       | 12.4      | 14             | 0.0064       | 13.8      |
| 18        | 13             | 0.0481       | 13.0      | 15             | 0.0038       | 14.4      |
| 19        | 14             | 0.0318       | 13.6      | 15             | 0.0096       | 15.1      |
| 20        | 15             | 0.0207       | 14.2      | 16             | 0.0059       | 15.7      |
| 21        | 15             | 0.0392       | 14.8      | 17             | 0.0036       | 16.3      |
| 22        | 16             | 0.0262       | 15.4      | 17             | 0.0084       | 17.0      |
| 23        | 16             | 0.0466       | 15.9      | 18             | 0.0053       | 17.6      |
| 24        | 17             | 0.0320       | 16.5      | 19             | 0.0033       | 18.2      |
| 25        | 18             | 0.0216       | 17.1      | 19             | 0.0073       | 18.8      |
| 26        | 18             | 0.0378       | 17.7      | 20             | 0.0047       | 19.4      |
| 27        | 19             | 0.0261       | 18.3      | 20             | 0.0096       | 20.0      |
| 28        | 19             | 0.0436       | 18.9      | 21             | 0.0063       | 20.7      |
| 29        | 20             | 0.0307       | 19.4      | 22             | 0.0041       | 21.3      |
| 30        | 20             | 0.0494       | 20.0      | 22             | 0.0081       | 21.9      |

$Y_1, Y_2$  are the numbers of markers supporting two different tree topologies,  $Y_1+Y_2$  is their sum,  $\alpha$  is the level of significance, "Critical  $Y_1$ " is the critical value of  $Y_1$  for rejecting  $H_0$  (see equation 16 in the Manuscript) at the level of significance  $\alpha$ ; " $\alpha\%$  border" is the critical value of  $Y_1$  calculated by the normal distribution approximation (see equation 27 in the Manuscript) at the level of significance  $\alpha$ .

For example, if we have 16 markers supporting the first tree topology and 5 markers supporting the second tree topology, their sum  $16+5=21$  can be found in column 1 at line 21 of Table S2. Then, with a selected significance value of  $\alpha<5\%$ , we can reject  $H_0$  and accept  $H_1$  because the tested value 16 is larger than the critical value 15 shown in column 2. We cannot reject  $H_0$  at a selected significance value of  $\alpha<1\%$  because the tested value 16 is smaller than the critical value 17. Thus we can support the first tree configuration with a significance of  $p<0.05$ .

**Testing: two- and three- directional searches**

Here, we present the next two tables (Tables S3 and S4) for testing possible tree/ancestral hybridization/polytomy configurations based on a two-step criterion (see 22). Table S3 is essential for testing the ancestral hybridization hypothesis against any other possible tree/polytomy configuration.

**Table S3. Critical numbers of markers for testing possible ancestral hybridization cases.**

| $Y_2+Y_3$ | critical $Y_2-Y_3$ | $\alpha<5\%$ | 5% border | $Y_2+Y_3$ | critical $Y_2-Y_3$ | $\alpha<1\%$ | 1% border |
|-----------|--------------------|--------------|-----------|-----------|--------------------|--------------|-----------|
| 6         | 6                  | 0.0313       | 5.8       | 6         |                    |              |           |
| 7         | 7                  | 0.0156       | 6.2       | 7         |                    |              |           |
| 8         | 8                  | 0.0078       | 6.5       | 8         | 8                  | 0.0078       | 8.3       |
| 9         | 7                  | 0.0391       | 6.9       | 9         | 9                  | 0.0039       | 8.7       |
| 10        | 8                  | 0.0215       | 7.2       | 10        | 10                 | 0.0020       | 9.1       |
| 11        | 9                  | 0.0117       | 7.5       | 11        | 11                 | 0.0010       | 9.5       |
| 12        | 8                  | 0.0386       | 7.8       | 12        | 10                 | 0.0063       | 9.9       |
| 13        | 9                  | 0.0225       | 8.1       | 13        | 11                 | 0.0034       | 10.3      |
| 14        | 10                 | 0.0129       | 8.3       | 14        | 12                 | 0.0018       | 10.6      |
| 15        | 9                  | 0.0352       | 8.6       | 15        | 11                 | 0.0074       | 11.0      |
| 16        | 10                 | 0.0213       | 8.8       | 16        | 12                 | 0.0042       | 11.3      |
| 17        | 9                  | 0.0490       | 9.1       | 17        | 13                 | 0.0023       | 11.6      |
| 18        | 10                 | 0.0309       | 9.3       | 18        | 12                 | 0.0075       | 11.9      |
| 19        | 11                 | 0.0192       | 9.5       | 19        | 13                 | 0.0044       | 12.2      |
| 20        | 10                 | 0.0414       | 9.8       | 20        | 14                 | 0.0026       | 12.5      |
| 21        | 11                 | 0.0266       | 10.0      | 21        | 13                 | 0.0072       | 12.8      |
| 22        | 12                 | 0.0169       | 10.2      | 22        | 14                 | 0.0043       | 13.1      |
| 23        | 11                 | 0.0347       | 10.4      | 23        | 15                 | 0.0026       | 13.4      |
| 24        | 12                 | 0.0227       | 10.6      | 24        | 14                 | 0.0066       | 13.6      |
| 25        | 11                 | 0.0433       | 10.8      | 25        | 15                 | 0.0041       | 13.9      |
| 26        | 12                 | 0.0290       | 11.0      | 26        | 14                 | 0.0094       | 14.1      |
| 27        | 13                 | 0.0192       | 11.2      | 27        | 15                 | 0.0059       | 14.4      |
| 28        | 12                 | 0.0357       | 11.4      | 28        | 16                 | 0.0037       | 14.6      |
| 29        | 13                 | 0.0241       | 11.6      | 29        | 15                 | 0.0081       | 14.9      |
| 30        | 12                 | 0.0428       | 11.7      | 30        | 16                 | 0.0052       | 15.1      |

$Y_2+Y_3$  is the sum of the two smallest of three values (numbers of markers) from the presence/absence pattern  $[Y_1, Y_2, Y_3]$ ; "Critical  $Y_2-Y_3$ " is the critical value of their difference for rejecting  $H_{23}$  (see equation 16 in the Manuscript) at the level of significance  $\alpha$ ;  $\alpha<5\%$  and  $\alpha<1\%$  are levels of significance for the statistical test; " $\alpha\%$  border" is the critical value of differences calculated by the normal distribution approximation (see equation 26 in the Manuscript) at the level of significance  $\alpha$ .

In Table S4 we present the critical values for the numbers of markers and the significance levels for supporting the bifurcating tree hypotheses, rejecting other trees, and for cases of polytomy (e.g., due to incomplete lineage sorting) for data from unbiased, two-directional searches in which ancestral hybridization has been preliminarily rejected.

**Table S4. Critical numbers of markers for testing a tree hypothesis against other possible trees and polytomy**

| $n=Y_1+Y_2+Y_3$ | critical $Y_1$ | $\alpha < 5\%$ | 5% border | critical $Y_1$ | $\alpha < 1\%$ | 1% border |
|-----------------|----------------|----------------|-----------|----------------|----------------|-----------|
| 3               | 3              | 0.0370         | 2.8       |                |                |           |
| 4               | 4              | 0.0123         | 3.4       |                |                |           |
| 5               | 4              | 0.0453         | 3.9       | 5              | 0.041          | 4.6       |
| 6               | 5              | 0.0178         | 4.4       | 6              | 0.014          | 5.2       |
| 7               | 5              | 0.0453         | 4.9       | 6              | 0.069          | 5.7       |
| 8               | 6              | 0.0197         | 5.4       | 7              | 0.026          | 6.3       |
| 9               | 6              | 0.0424         | 5.8       | 7              | 0.083          | 6.8       |
| 10              | 7              | 0.0197         | 6.3       | 8              | 0.034          | 7.3       |
| 11              | 7              | 0.0386         | 6.7       | 8              | 0.088          | 7.8       |
| 12              | 8              | 0.0188         | 7.2       | 9              | 0.039          | 8.3       |
| 13              | 8              | 0.0347         | 7.6       | 9              | 0.088          | 8.8       |
| 14              | 9              | 0.0174         | 8.1       | 10             | 0.040          | 9.3       |
| 15              | 9              | 0.0308         | 8.5       | 10             | 0.085          | 9.7       |
| 16              | 9              | 0.0500         | 8.9       | 11             | 0.040          | 10.2      |
| 17              | 10             | 0.0273         | 9.4       | 11             | 0.080          | 10.7      |
| 18              | 10             | 0.0433         | 9.8       | 12             | 0.039          | 11.2      |
| 19              | 11             | 0.0241         | 10.2      | 12             | 0.074          | 11.6      |
| 20              | 11             | 0.0376         | 10.6      | 13             | 0.037          | 12.1      |
| 21              | 12             | 0.0212         | 11.1      | 13             | 0.068          | 12.5      |
| 22              | 12             | 0.0327         | 11.5      | 14             | 0.035          | 13.0      |
| 23              | 12             | 0.0480         | 11.9      | 14             | 0.062          | 13.4      |
| 24              | 13             | 0.0284         | 12.3      | 15             | 0.032          | 13.9      |
| 25              | 13             | 0.0415         | 12.7      | 15             | 0.056          | 14.3      |
| 26              | 14             | 0.0248         | 13.1      | 15             | 0.092          | 14.8      |
| 27              | 14             | 0.0359         | 13.5      | 16             | 0.050          | 15.2      |
| 28              | 15             | 0.0216         | 13.9      | 16             | 0.082          | 15.6      |
| 29              | 15             | 0.0311         | 14.3      | 17             | 0.045          | 16.1      |
| 30              | 15             | 0.0435         | 14.7      | 17             | 0.072          | 16.5      |

$n=Y_1+Y_2+Y_3$  is the number of detected phylogenetic markers in all three directions; “critical  $Y_1$ ” is the closest critical value of  $Y_1$  for rejecting hypothesis ( $\bar{H}_{1+}$ ) (see equation 16 in the Manuscript) at significance level  $\alpha$ ;  $\alpha < 5\%$  and  $\alpha < 1\%$  are levels of significance for the statistical test; “ $\alpha\%$  border” is the critical value of  $Y_1$  calculated by the normal distribution approximation (see equation 25 in the Manuscript) at the level of significance  $\alpha$ .

The statistical evaluation of the phylogenetic pattern  $[Y_1, Y_2, Y_3]$ , where  $Y_1 \geq Y_2 \geq Y_3$  includes the following steps: (1) if  $Y_2 > Y_3$ , calculate the difference  $Y_2 - Y_3$  and the sum  $Y_2 + Y_3$ , (2) check the significance level of the difference  $Y_2 - Y_3$  in Table S3 by finding the corresponding number in the

first column, and (3) compare this difference to the critical values; if difference  $Y_2 - Y_3$  is smaller than the critical value, the hybridization hypothesis is rejected.

If hybridization is rejected, the full sum  $n = Y_1 + Y_2 + Y_3$  is calculated, identified in the first column of Table S4, and  $Y_1$  then compared with the given critical value in the corresponding row. If  $Y_1$  is larger or equal to the critical value then the polytomy hypothesis  $\bar{H}_{1+}$  can be rejected at the selected level of significance, and we have no reason to reject the tree under consideration.

For example, if we have 16 markers supporting the first tree topology, 5 markers supporting the second tree topology, and 4 markers supporting the third tree topology, the sum of their two smallest values ( $5 + 4 = 9$ ) can be found in column 1 at line 21 of Supplementary Table S3. Then, at a selected significance value of  $\alpha < 5\%$  we cannot reject  $H_0$  because the tested value of the difference ( $5 - 4 = 1$ ) is smaller than the critical value 7. Hence we can reject the hybridization scenario. The next step of testing is to find the sum of all markers ( $16 + 5 + 4 = 25$ ) in column 1 of Table S4. Then, with a selected significance value of  $\alpha < 1\%$ , the critical value of  $Y_1$  (15) indicated in column 5 of the same line is smaller than our value 16 and we can reject  $H_0$  and accept  $H_1$ . Thus we can support the first tree configuration with a significance of  $p < 0.05$ .

Of course, if there are no conflicting markers in the presence/absence patterns  $[n:0:0]$  or the smallest values are equal  $[n:k:k]$ , the first test can be omitted and the statistical evaluation can be restricted to Table S4.
