# Supplementary material for: Incomplete Lineage Sorting and Hybridization Statistics for Large-Scale Retroposon Insertion Data
Source: PubMed Central journal article supplement (PMC4788455; doi:10.1371/journal.pcbi.1004812), 2016-03-11
Supplement: pcbi.1004812.s004.pdf [file pcbi.1004812.s004.pdf]

## Confidence intervals for the drift time $\tau$

---

### Method for estimating the confidence intervals for the drift time

According to our proposed mathematical model (equation S1.38 - S1.39 in S1 Appendix) we have:

$$\begin{aligned} p_1 &= 1 - \frac{2}{3}\Psi(\tau_1) \\ p_2 &= p_3 = \frac{1}{3}\Psi(\tau_1) \end{aligned} \quad (\text{S4.1})$$

where

$$\Psi(\tau) = \frac{e^{-\tau}}{1 + \frac{n_0}{n_1}(\tau + e^{-\tau} - 1)}, \quad (\text{S4.2})$$

$$\tau_1 = \frac{T_1}{2N_1} \text{ is the drift time for the branch AB,}$$

$N_1$  the average effective population size of the first branch before the split (at the period  $[t_0, t_1]$ );  
 $n_1$  the average number of new insertions of retroelements per generation on the first branch (at the period  $[t_0, t_1]$ ), and  
 $n_0$  the average number of new insertions of retroelements per one generation in an ancestral population. If hypothesis  $H_1$  is accepted and there are no reasons to reject the *C-tree* hypothesis (Fig. 2a), it is possible to construct a confidence interval for the parameter  $p_1$ . Specifying a confidence probability  $\beta = 1 - \alpha$ , the lower and upper bounds of the confidence interval ( $p'_1, p''_1$ ) are determined by the conditions:

$$I_{p'_1}(Y_1, Y_2 + Y_3 + 1) = \frac{\alpha}{2} \quad (\text{S4.3})$$

$$I_{p''_1}(Y_1 + 1, Y_2 + Y_3) = 1 - \frac{\alpha}{2}, \quad (\text{S4.4})$$

here  $Y_1, Y_2, Y_3$  are values of  $\eta_1, \eta_2, \eta_3$  obtained from the retrophylogenomic reconstruction. Values of  $p'_1$  can be obtained by using tables of incomplete beta functions, or calculated by the formula:

$$p'_1 = \frac{Y_1}{Y_1 + (Y_2 + Y_3 + 1) \cdot F\left(2(Y_2 + Y_3 + 1), 2Y_1, 1 - \frac{\alpha}{2}\right)}, \quad (\text{S4.5})$$

$$p''_1 = \frac{(Y_1 + 1) \cdot F\left(2(Y_1 + 1), 2(Y_2 + Y_3), 1 - \frac{\alpha}{2}\right)}{(Y_1 + 1) \cdot F\left(2(Y_1 + 1), 2(Y_2 + Y_3), 1 - \frac{\alpha}{2}\right) + Y_2 + Y_3}, \quad (\text{S4.6})$$

where  $F(d_1, d_2, P)$  is the  $P$ -quantile for the  $F$ -distribution (Fisher-Snedecor distribution), determined from the condition:

$$P(F(d_1, d_2) < F(d_1, d_2, P)) = P, \quad (\text{S4.7})$$

and  $F(d_1, d_2)$  is a random variable having an  $F$ -distribution with parameters  $d_1$  and  $d_2$ . Based on the value  $p'_1$  and  $p''_1$  we can construct lower and upper bounds for  $\tau_1 = \frac{T_1}{2N_1}$ , by substituting them instead of  $p_1$  into the first of equations (S4.1) and solving the resulting equation. Note that if  $Y_1 \gg Y_2 + Y_3$  (in particular:  $Y_2 + Y_3 = 0$ ), it is appropriate to consider the confidence region:  $p_1 > p'_1$  (and  $\tau_1 > \tau'_1$  - respectively). Then, in the formulas (S4.3) and (S4.5)  $\frac{\alpha}{2}$  must be replaced with  $\alpha$ .

### Evaluation of confidence interval for the drift time

As shown above, if there are no reasons to reject the *C-tree* hypothesis (Fig. 2a), based on the value  $p'_1$  we can construct confidence intervals for  $\tau_1 = \frac{T_1}{2N_1}$ . The Tables (Tables S4-S6) show the results of the confidence intervals for  $p_1$  and the corresponding bounds for the relative duration of branch AB normalized to effective population sizes ( $\tau_1$  - drift-time) (with values of the ratio  $\frac{n_1}{n_0} = 0.5, 1, \text{ and } 2$ , where this ratio indirectly characterizes the proportion that the population size of branch AB is of the ancestral populations). The confidence interval indicates the range of possible values of drift time for the branch AB. In cases when more than three lineages are studied, this information can provide additional information on the structure of the joint species tree. Information of the effective population size and generation time on branch AB can provide some estimation of branch lengths.

As an example of constructing confidence intervals of drift time we can apply the data presented in Waddell et al. (Waddell, Kishino, and Ota 2001), given the following SINE marker presence/absence pattern [50:8:6] for Human-Mouse, Human-Cow, and Mouse-Cow, respectively. Considering  $\beta=0.95$  ( $\alpha=0.05$ ), we can use formulas (S4.5)-(S4.6). According to the  $F$ -distribution tables, we have:  $F(30; 100; 0.975) = 1.715$ ,  $F(102; 28; 0.975) = 1.920$ , thus:

$$p'_1 = \frac{50}{50 + 15 \cdot 1.715} = 0.660,$$

$$p''_1 = \frac{51 \cdot 1.920}{51 \cdot 1.920 + 8 + 6} = 0.875.$$

Substituting these values instead of  $p_1$  in the equation:

$$p_1 = 1 - \frac{2}{3} \Psi(\tau_1) \quad (\text{S4.8})$$

we solve the equations obtained for  $r = \frac{n_1}{n_0}$  ratio values of 0.5, 1, and 2. Figure S1 illustrates the construction of graphs of the corresponding functions. The result is a 95% confidence interval for  $\tau_1$ : (0.602; 1.395) at  $r = 0.5$ ; (0.553; 1.246) at  $r = 1$ ; and (0.489; 1.071) at  $r = 2$ . Note that the left ends of the obtained intervals can be regarded as the lower bounds of the unilateral 97.5% confidence intervals. The lower bounds of the unilateral 95% confidence intervals can be found by substituting in (S4.5) the value of  $F(30, 100, 0.95) = 1.573$ . Then:

$$p'_1 = \frac{50}{50 + 15 \cdot 1.573} = 0.679.$$

Hence, solving the equation (S4.8), we obtain the lower confidence limits for  $\tau_1$ : 0.650 at  $r = 0.5$ ; 0.595 at  $r = 1$ ; 0.523 at  $r = 2$ . These confidence intervals are in good agreement with the results of the point estimation (0.863) of Waddell et al. (Waddell, Kishino, and Ota 2001), which is located in the middle of the calculated confidence interval at  $r=1$ . However, the confidence intervals provide stronger estimations of drift time and indicate not only lower and higher probable values of this parameter, but also the variability range of this interval.

### **Simulation of confidence intervals for the drift time $\tau$ in a diploid population.**

Because the drift time or branch length  $\tau$  is one of the main parameters of our statistical model and can be directly calculated for inserted phylogenetic marker distributions, we performed a simple Monte-Carlo simulation according to Waxman (Waxman, 2011) of the different branch lengths, assuming a fixed effective population size  $N_e$ . In our simulation of a sexually reproducing diploid population of  $N_e=100$ , in each generation, 100 phylogenetic markers were randomly inserted into the population. Each new marker was introduced randomly in an individual of the population, implementing a new allelic variation. We define the loss of a marker if we could not find this marker in the current population, and define fixation of a marker if this marker is present homogeneously in all members of the population. After  $2 \cdot N_e = 200$  generations, we split the first progenitor population into two, with an initial  $N_e=100$ . Next, after  $T$  generations (where  $T$  is a changing variable ranging between  $50 \leq T \leq 500$  stepwise by 50), we split one of the new populations into two as described above. After the second split we stopped introducing new markers and waited until all previously introduced markers were lost or fixed in all three populations. For each value of  $T$  we performed 100 repetitions. Then we calculated

$\tau = \frac{T}{2 \cdot N_e}$  for each value of  $T$ , and collected information about markers shared between two of the three final populations in all possible combinations. Based on marker distributions among three populations, 95% confidence interval limits of tau were calculated as described above. The results are presented in Table S7. These results are strongly correlated to the simulation presets, e.g., medians of the confidence intervals are slightly different to simulation parameters (maximum of difference is 5.2%). Interestingly the significance of the branch for the drift time value 0.25 is already strongly supported ( $p < 0.0053$ ).

### Examples of calculation of $N_e$ confidence intervals for ancestral lineages

Testing a hypothetical SINE presence/absence pattern from the work of Waddell et al. (2001): (50:8:6) for human-mouse, human-cow, and mouse-cow, respectively, we obtain a 95% confidence interval for  $\tau_1$ : (0.553; 1.246) at a ratio  $\frac{n_0}{n_1}$  of normalized population sizes of young

branches equivalent to 1 (see above). Taking into account that  $\tau_{AB} = \frac{T_{AB}}{2N_{AB}}$  Waxman (2011),

where  $T_{AB}$  is the length of ancestral branch between connected lineages in generations, and  $N_{AB}$  is the effective ancestral population size on the ancestral brunch, we can give confidence interval limits for the effective population size or the length of the ancestral branches. For example, using parameters from the above example of Waddell et al. (2001): 1 year per generation and the length of the branch equal to 5 million years, we can estimate confidence intervals for  $N_e$ . For 95% significance, the confidence interval of  $N_e$  will be between  $2.01 \times 10^6$  and  $4.52 \times 10^6$ , which agrees with the  $N_e = 2.90 \times 10^6$  presented by Waddell et al. (2001).

Based on the significant support for a common ancestry of Pinnipedia and Musteloidea (Doronina et al, 2015), we can estimate the confidence intervals for the drift time  $\tau$  for this ancestral branch. Taking the ratio of normalized effective population sizes  $\frac{n_0}{n_1} = 1$ , then the 95%

confidence intervals for the drift time  $\tau$  is between 0.313 and 0.534. The length of the common arctoid ancestral branch is estimated at 2.1 million years (Eizirik et al, 2010). Based on the expectation that ancestral arctoids were of relatively small size (Flynn & Nedbal 1998, Wang et al. 2005), we can assume a generation time of about 5 years. With these parameters a rough estimation of the ancestral effective population size is possible. Within a 95% confidence interval, the estimated  $N_e$  is  $0.39 \times 10^6$ -  $0.67 \times 10^6$ . We should mention that this calculation is based on a rough estimation of the generation time, which is difficult to verify after more than 40 million years of evolution. In addition only short internal phylogenetic branches with conflicting

patterns of presence/absence markers provide sufficient information for such estimation. In any event the calculations lead only to a very weak and unstable indication because retroposon markers accumulate randomly over time and their frequencies depend on the activity of master genes whose activity can differ between different phylogenetic episodes.

## **Supplementary References**

- Waddell, P. J., H. Kishino, and R. Ota. 2001. A phylogenetic foundation for comparative mammalian genomics. *Genome Inform* **12**:141-153.
- Waxman, D. 2011. A unified treatment of the probability of fixation when population size and the strength of selection change over time. *Genetics* **188**: 907-913.
- Eizirik E, Murphy WJ, Koepfli KP, Johnson WE, Dragoo JW, et al. (2010) Pattern and timing of diversification of the mammalian order Carnivora inferred from multiple nuclear gene sequences. *Mol Phylogenet Evol* 56: 49-63.
- Flynn JJ, Nedbal MA (1998) Phylogeny of the Carnivora (Mammalia): congruence vs incompatibility among multiple data sets. *Mol Phylogenet Evol* 9: 414-426.
- Wang XM, McKenna MC, Dashzeveg D (2005) *Amphicticeps* and *Amphicynodon* (Arctoidea, Carnivora) from Hsanda Gol Formation, central Mongolia and phylogeny of basal arctoids with comments on zoogeography. *Am Mus Nov* 3483: 1-57.

Figure S1

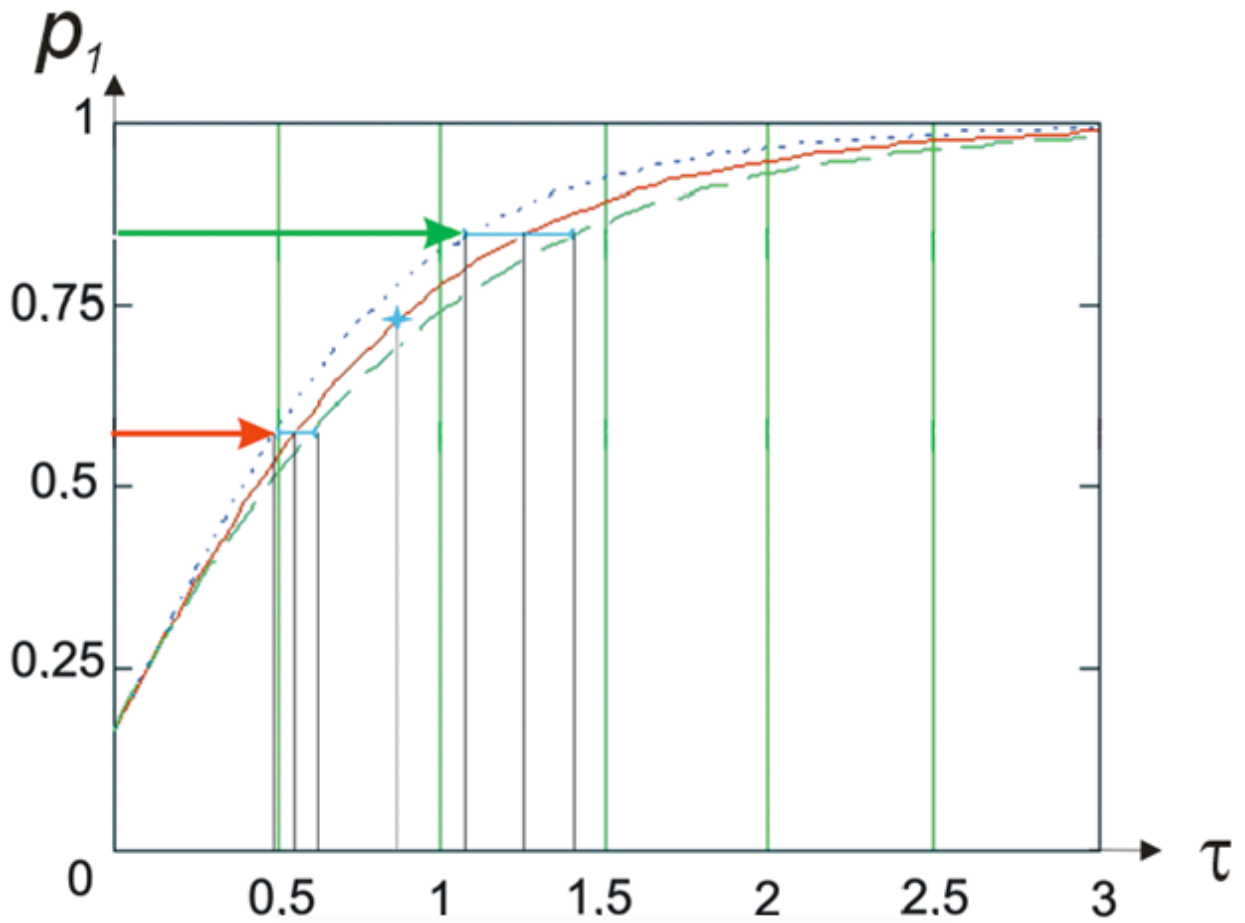

Figure S1. Finding 95% confidence limits for drift time.

The graph shows curves for the function  $p_1 = 1 - \frac{2}{3} \cdot \frac{e^{-\tau_1}}{1 + \frac{n_0}{n_1}(\tau + e^{-\tau_1} - 1)}$  calculated for

different ratios of  $\frac{n_1}{n_0}$  (green dashed line at 0.5; red line at 1, blue dotted line at 2). Green

and red arrows show upper and lower 95% confidential interval bounds, respectively.

Light blue lines with brackets indicate differences in values, dependent on the  $\frac{n_1}{n_0}$  ratio.

Light blue star marks the value of drift time 0.863, discussed in Waddell et al. (Waddell, Kishino, and Ota 2001). Black vertical lines project values to horizontal axis.

**Table S5. Lower bounds of 95% and 99% confidence intervals of diffusion time for branch AB in the “C-tree”.**

| Lower bound of 95% confidential interval |                |                |                |       |       | Lower bound of 99% confidential interval |                |                |                |       |       |
|------------------------------------------|----------------|----------------|----------------|-------|-------|------------------------------------------|----------------|----------------|----------------|-------|-------|
| n                                        | Y <sub>1</sub> | p <sub>1</sub> | τ <sub>1</sub> |       |       | n                                        | Y <sub>1</sub> | p <sub>1</sub> | τ <sub>1</sub> |       |       |
|                                          |                |                | r=0.5          | r=1   | r=2   |                                          |                |                | r=0.5          | r=1   | r=2   |
| 3                                        | 3              | 0.368          | 0.053          | 0.053 | 0.051 | -                                        | -              | -              | -              | -     | -     |
| 4                                        | 4              | 0.473          | 0.223          | 0.214 | 0.199 | -                                        | -              | -              | -              | -     | -     |
| 5                                        | 5              | 0.549          | 0.363          | 0.341 | 0.309 | 5                                        | 5              | 0.398          | 0.100          | 0.098 | 0.094 |
| 5                                        | 4              | 0.343          | 0.014          | 0.014 | 0.014 | -                                        | -              | -              | -              | -     | -     |
| 6                                        | 6              | 0.607          | 0.480          | 0.446 | 0.398 | 6                                        | 6              | 0.464          | 0.208          | 0.200 | 0.186 |
| 6                                        | 5              | 0.418          | 0.132          | 0.128 | 0.122 | -                                        | -              | -              | -              | -     | -     |
| 7                                        | 7              | 0.652          | 0.582          | 0.536 | 0.473 | 7                                        | 7              | 0.518          | 0.304          | 0.287 | 0.263 |
| 7                                        | 6              | 0.479          | 0.234          | 0.224 | 0.208 | 7                                        | 6              | 0.357          | 0.035          | 0.035 | 0.034 |
| 7                                        | 5              | 0.341          | 0.012          | 0.012 | 0.012 | -                                        | -              | -              | -              | -     | -     |
| 8                                        | 8              | 0.688          | 0.671          | 0.614 | 0.539 | 8                                        | 8              | 0.562          | 0.388          | 0.364 | 0.328 |
| 8                                        | 7              | 0.529          | 0.325          | 0.306 | 0.279 | 8                                        | 7              | 0.410          | 0.119          | 0.116 | 0.111 |
| 8                                        | 6              | 0.400          | 0.103          | 0.101 | 0.097 | -                                        | -              | -              | -              | -     | -     |
| 9                                        | 9              | 0.717          | 0.751          | 0.684 | 0.598 | 9                                        | 9              | 0.599          | 0.464          | 0.432 | 0.386 |
| 9                                        | 8              | 0.571          | 0.405          | 0.379 | 0.341 | 9                                        | 8              | 0.456          | 0.194          | 0.187 | 0.175 |
| 9                                        | 7              | 0.450          | 0.185          | 0.178 | 0.167 | 9                                        | 7              | 0.344          | 0.016          | 0.016 | 0.015 |
| 9                                        | 6              | 0.345          | 0.017          | 0.017 | 0.017 | -                                        | -              | -              | -              | -     | -     |
| 10                                       | 10             | 0.741          | 0.823          | 0.747 | 0.650 | 10                                       | 10             | 0.631          | 0.533          | 0.493 | 0.438 |
| 10                                       | 9              | 0.606          | 0.478          | 0.444 | 0.396 | 10                                       | 9              | 0.496          | 0.263          | 0.251 | 0.231 |
| 10                                       | 8              | 0.493          | 0.259          | 0.246 | 0.227 | 10                                       | 8              | 0.388          | 0.084          | 0.083 | 0.080 |
| 10                                       | 7              | 0.393          | 0.092          | 0.090 | 0.087 | -                                        | -              | -              | -              | -     | -     |
| 11                                       | 11             | 0.762          | 0.889          | 0.804 | 0.698 | 11                                       | 11             | 0.658          | 0.596          | 0.548 | 0.484 |
| 11                                       | 10             | 0.636          | 0.544          | 0.502 | 0.445 | 11                                       | 10             | 0.530          | 0.326          | 0.308 | 0.281 |
| 11                                       | 9              | 0.530          | 0.326          | 0.307 | 0.280 | 11                                       | 9              | 0.428          | 0.147          | 0.143 | 0.135 |
| 11                                       | 8              | 0.436          | 0.160          | 0.155 | 0.146 | 11                                       | 8              | 0.340          | 0.009          | 0.009 | 0.009 |
| 11                                       | 7              | 0.350          | 0.025          | 0.025 | 0.024 | -                                        | -              | -              | -              | -     | -     |
| 12                                       | 12             | 0.779          | 0.949          | 0.857 | 0.742 | 12                                       | 12             | 0.681          | 0.655          | 0.599 | 0.527 |
| 12                                       | 11             | 0.661          | 0.605          | 0.556 | 0.490 | 12                                       | 11             | 0.560          | 0.384          | 0.360 | 0.325 |
| 12                                       | 10             | 0.562          | 0.387          | 0.363 | 0.328 | 12                                       | 10             | 0.463          | 0.206          | 0.198 | 0.184 |
| 12                                       | 9              | 0.473          | 0.223          | 0.213 | 0.198 | 12                                       | 9              | 0.378          | 0.068          | 0.067 | 0.065 |
| 12                                       | 8              | 0.391          | 0.088          | 0.087 | 0.083 | -                                        | -              | -              | -              | -     | -     |
| 13                                       | 13             | 0.794          | 1.005          | 0.905 | 0.783 | 13                                       | 13             | 0.702          | 0.708          | 0.647 | 0.567 |
| 13                                       | 12             | 0.684          | 0.661          | 0.605 | 0.532 | 13                                       | 12             | 0.587          | 0.438          | 0.409 | 0.367 |
| 13                                       | 11             | 0.590          | 0.444          | 0.414 | 0.371 | 13                                       | 11             | 0.494          | 0.260          | 0.248 | 0.228 |
| 13                                       | 10             | 0.505          | 0.281          | 0.266 | 0.245 | 13                                       | 10             | 0.412          | 0.122          | 0.119 | 0.114 |
| 13                                       | 9              | 0.427          | 0.147          | 0.142 | 0.135 | 13                                       | 9              | 0.339          | 0.009          | 0.009 | 0.009 |
| 13                                       | 8              | 0.355          | 0.032          | 0.032 | 0.032 | -                                        | -              | -              | -              | -     | -     |
| 14                                       | 14             | 0.807          | 1.057          | 0.951 | 0.821 | 14                                       | 14             | 0.720          | 0.759          | 0.691 | 0.603 |
| 14                                       | 13             | 0.703          | 0.713          | 0.650 | 0.570 | 14                                       | 13             | 0.611          | 0.489          | 0.453 | 0.404 |
| 14                                       | 12             | 0.615          | 0.497          | 0.461 | 0.410 | 14                                       | 12             | 0.522          | 0.311          | 0.294 | 0.268 |
| 14                                       | 11             | 0.534          | 0.334          | 0.315 | 0.287 | 14                                       | 11             | 0.443          | 0.173          | 0.167 | 0.157 |
| 14                                       | 10             | 0.460          | 0.201          | 0.193 | 0.180 | 14                                       | 10             | 0.373          | 0.060          | 0.059 | 0.057 |
| 14                                       | 9              | 0.390          | 0.088          | 0.086 | 0.083 | -                                        | -              | -              | -              | -     | -     |
| 15                                       | 15             | 0.819          | 1.106          | 0.993 | 0.857 | 15                                       | 15             | 0.736          | 0.806          | 0.732 | 0.638 |
| 15                                       | 14             | 0.721          | 0.761          | 0.693 | 0.605 | 15                                       | 14             | 0.632          | 0.536          | 0.495 | 0.439 |
| 15                                       | 13             | 0.637          | 0.546          | 0.504 | 0.447 | 15                                       | 13             | 0.547          | 0.358          | 0.337 | 0.305 |
| 15                                       | 12             | 0.560          | 0.384          | 0.360 | 0.325 | 15                                       | 12             | 0.471          | 0.221          | 0.212 | 0.197 |
| 15                                       | 11             | 0.489          | 0.252          | 0.240 | 0.222 | 15                                       | 11             | 0.403          | 0.108          | 0.105 | 0.101 |
| 15                                       | 10             | 0.423          | 0.139          | 0.135 | 0.128 | 15                                       | 10             | 0.340          | 0.010          | 0.010 | 0.010 |
| 15                                       | 9              | 0.360          | 0.040          | 0.039 | 0.039 | -                                        | -              | -              | -              | -     | -     |

**Notes:** For the “C-tree” [Y<sub>1</sub>, Y<sub>2</sub>, Y<sub>3</sub>], where  $Y_1 \geq Y_2 \geq Y_3$ ;  $n=Y_1+Y_2+Y_3$ ; Y<sub>1</sub> is the number of markers supporting the “C-tree”; p<sub>1</sub> is the relative number of markers supporting the AB branch in the full

set of available markers;  $\tau_1 = \frac{T_1}{2N_1}$  is the drift time for the branch AB (where  $T_1$  is the length of the branch AB in generations and  $N_1$  is the average effective population size on the branch AB).

**Table S6. Lower and higher bounds of 95% confidence intervals of diffusion time for branch AB in the “C-tree”**

| $n$ | $Y_1$ | $p_1'$ | $p_1''$ | $r=0.5$   |            | $r=1$     |            | $r=2$     |            |
|-----|-------|--------|---------|-----------|------------|-----------|------------|-----------|------------|
|     |       |        |         | $\tau_1'$ | $\tau_1''$ | $\tau_1'$ | $\tau_1''$ | $\tau_1'$ | $\tau_1''$ |
| 6   | 5     | 0,359  | 0,996   | 0,039     | 4,121      | 0,038     | 3,739      | 0,038     | 3,322      |
| 7   | 6     | 0,421  | 0,996   | 0,137     | 4,250      | 0,133     | 3,862      | 0,126     | 3,437      |
| 8   | 7     | 0,473  | 0,997   | 0,224     | 4,363      | 0,215     | 3,968      | 0,199     | 3,538      |
| 8   | 6     | 0,349  | 0,968   | 0,024     | 2,467      | 0,024     | 2,203      | 0,023     | 1,906      |
| 9   | 8     | 0,518  | 0,997   | 0,303     | 4,462      | 0,287     | 4,063      | 0,262     | 3,628      |
| 9   | 7     | 0,400  | 0,972   | 0,103     | 2,565      | 0,100     | 2,292      | 0,096     | 1,987      |
| 10  | 9     | 0,555  | 0,997   | 0,374     | 4,551      | 0,351     | 4,148      | 0,317     | 3,708      |
| 10  | 8     | 0,444  | 0,975   | 0,174     | 2,653      | 0,168     | 2,373      | 0,158     | 2,059      |
| 10  | 7     | 0,348  | 0,933   | 0,021     | 1,884      | 0,021     | 1,678      | 0,021     | 1,443      |
| 11  | 10    | 0,587  | 0,998   | 0,438     | 4,632      | 0,409     | 4,225      | 0,367     | 3,781      |
| 11  | 9     | 0,482  | 0,977   | 0,240     | 2,733      | 0,229     | 2,445      | 0,212     | 2,125      |
| 11  | 8     | 0,390  | 0,940   | 0,087     | 1,965      | 0,086     | 1,750      | 0,083     | 1,506      |
| 12  | 11    | 0,615  | 0,998   | 0,498     | 4,706      | 0,462     | 4,295      | 0,411     | 3,849      |
| 12  | 10    | 0,516  | 0,979   | 0,300     | 2,805      | 0,284     | 2,512      | 0,260     | 2,185      |
| 12  | 9     | 0,428  | 0,945   | 0,148     | 2,038      | 0,144     | 1,815      | 0,136     | 1,563      |
| 12  | 8     | 0,349  | 0,901   | 0,023     | 1,575      | 0,023     | 1,404      | 0,023     | 1,206      |
| 13  | 12    | 0,640  | 0,998   | 0,553     | 4,774      | 0,510     | 4,360      | 0,452     | 3,911      |
| 13  | 11    | 0,546  | 0,981   | 0,355     | 2,872      | 0,334     | 2,573      | 0,303     | 2,240      |
| 13  | 10    | 0,462  | 0,950   | 0,204     | 2,104      | 0,196     | 1,875      | 0,183     | 1,616      |
| 13  | 9     | 0,386  | 0,909   | 0,080     | 1,643      | 0,079     | 1,464      | 0,076     | 1,258      |
| 14  | 13    | 0,661  | 0,998   | 0,605     | 4,837      | 0,556     | 4,421      | 0,490     | 3,968      |
| 14  | 12    | 0,572  | 0,982   | 0,407     | 2,934      | 0,381     | 2,630      | 0,343     | 2,292      |
| 14  | 11    | 0,492  | 0,953   | 0,257     | 2,166      | 0,245     | 1,931      | 0,226     | 1,665      |
| 14  | 10    | 0,419  | 0,916   | 0,133     | 1,706      | 0,129     | 1,520      | 0,123     | 1,306      |
| 14  | 9     | 0,351  | 0,872   | 0,027     | 1,379      | 0,027     | 1,232      | 0,027     | 1,059      |
| 15  | 14    | 0,681  | 0,998   | 0,653     | 4,896      | 0,598     | 4,477      | 0,526     | 4,022      |
| 15  | 13    | 0,595  | 0,983   | 0,456     | 2,991      | 0,424     | 2,683      | 0,379     | 2,340      |
| 15  | 12    | 0,519  | 0,957   | 0,306     | 2,224      | 0,289     | 1,982      | 0,264     | 1,711      |
| 15  | 11    | 0,449  | 0,922   | 0,183     | 1,764      | 0,176     | 1,571      | 0,165     | 1,350      |
| 15  | 10    | 0,384  | 0,882   | 0,077     | 1,438      | 0,076     | 1,284      | 0,073     | 1,103      |

For the *C-tree* [ $Y_1, Y_2, Y_3$ ], where  $Y_1 \geq Y_2 \geq Y_3$ :  $n=Y_1+Y_2+Y_3$ ;  $Y_1$  is the number of markers supporting the *C-tree*;  $p_1$  is the relative number of markers supporting the AB branch in the full set of available markers;  $\tau_1 = \frac{T_1}{2N_1}$  is the drift time for the branch AB (where  $T_1$  is the length of the branch AB in generations and  $N_1$  is the average effective population size at the branch AB); (') and (") denote lower and higher bounds of confidence intervals, respectively, for the corresponding values.



**Table S7. Lower and higher bounds of 99% confidence intervals of diffusion time for branch AB in the “C-tree”**

| n  | Y <sub>1</sub> | p <sub>1</sub> ' | p <sub>1</sub> '' | r=0.5            |                   | r=1              |                   | r=2              |                   |
|----|----------------|------------------|-------------------|------------------|-------------------|------------------|-------------------|------------------|-------------------|
|    |                |                  |                   | τ <sub>1</sub> ' | τ <sub>1</sub> '' | τ <sub>1</sub> ' | τ <sub>1</sub> '' | τ <sub>1</sub> ' | τ <sub>1</sub> '' |
| 8  | 7              | 0,368            | 0,999             | 0,053            | 5,752             | 0,053            | 5,301             | 0,052            | 4,813             |
| 9  | 8              | 0,415            | 0,999             | 0,127            | 5,855             | 0,123            | 5,401             | 0,118            | 4,909             |
| 10 | 9              | 0,456            | 0,999             | 0,194            | 5,947             | 0,187            | 5,490             | 0,174            | 4,995             |
| 10 | 8              | 0,352            | 0,989             | 0,028            | 3,336             | 0,028            | 3,002             | 0,027            | 2,635             |
| 11 | 10             | 0,491            | 1,000             | 0,256            | 6,031             | 0,244            | 5,570             | 0,225            | 5,074             |
| 11 | 9              | 0,392            | 0,990             | 0,089            | 3,418             | 0,088            | 3,079             | 0,084            | 2,705             |
| 12 | 11             | 0,523            | 1,000             | 0,313            | 6,107             | 0,296            | 5,644             | 0,270            | 5,145             |
| 12 | 10             | 0,427            | 0,991             | 0,146            | 3,493             | 0,142            | 3,148             | 0,134            | 2,769             |
| 12 | 9              | 0,345            | 0,970             | 0,017            | 2,506             | 0,017            | 2,238             | 0,017            | 1,938             |
| 13 | 12             | 0,551            | 1,000             | 0,366            | 6,177             | 0,344            | 5,712             | 0,311            | 5,211             |
| 13 | 11             | 0,459            | 0,992             | 0,200            | 3,561             | 0,192            | 3,212             | 0,179            | 2,829             |
| 13 | 10             | 0,379            | 0,972             | 0,070            | 2,574             | 0,069            | 2,301             | 0,067            | 1,994             |
| 14 | 13             | 0,576            | 1,000             | 0,415            | 6,242             | 0,388            | 5,774             | 0,349            | 5,272             |
| 14 | 12             | 0,488            | 0,992             | 0,249            | 3,625             | 0,238            | 3,272             | 0,220            | 2,884             |
| 14 | 11             | 0,411            | 0,974             | 0,120            | 2,638             | 0,117            | 2,358             | 0,112            | 2,046             |
| 14 | 10             | 0,342            | 0,947             | 0,013            | 2,071             | 0,013            | 1,845             | 0,013            | 1,590             |
| 15 | 14             | 0,598            | 1,000             | 0,462            | 6,303             | 0,430            | 5,833             | 0,384            | 5,330             |
| 15 | 13             | 0,514            | 0,993             | 0,296            | 3,684             | 0,280            | 3,327             | 0,257            | 2,935             |
| 15 | 12             | 0,439            | 0,976             | 0,167            | 2,697             | 0,161            | 2,412             | 0,152            | 2,095             |
| 15 | 11             | 0,373            | 0,951             | 0,060            | 2,130             | 0,059            | 1,898             | 0,058            | 1,637             |

For the C-tree [Y<sub>1</sub>, Y<sub>2</sub>, Y<sub>3</sub>], where Y<sub>1</sub> ≥ Y<sub>2</sub> ≥ Y<sub>3</sub>: n=Y<sub>1</sub>+Y<sub>2</sub>+Y<sub>3</sub>; Y<sub>1</sub> is the number of markers supporting the C-tree; p<sub>1</sub> is the relative number of markers supporting the AB branch in the full set of available markers; τ<sub>1</sub> =  $\frac{T_1}{2N_1}$  is the drift time for the branch AB (where T<sub>1</sub> is the

length of the branch AB in generations and N<sub>1</sub> is the average effective population size at the branch AB); ' and '' denote lower and higher bounds of confidential intervals, respectively, for the corresponding values.

**Table S8. Results of simulation of diffusion time 95% confidential intervals.**

| branch length (T) | drift time ( $\tau$ ) | 95% confidential limits of $\tau$ |             | calculated median $\tau$ | significance of the tree (KKSC test) |
|-------------------|-----------------------|-----------------------------------|-------------|--------------------------|--------------------------------------|
|                   |                       | lower bound                       | upper bound |                          |                                      |
| 50                | 0.25                  | 0.050±0.003                       | 0.446±0.005 | 0.248±0.004              | $0.52 \cdot 10^{-2}$                 |
| 100               | 0.50                  | 0.251±0.007                       | 0.752±0.005 | 0.501±0.006              | $0.56 \cdot 10^{-5}$                 |
| 150               | 0.75                  | 0.439±0.006                       | 1.054±0.007 | 0.747±0.006              | $0.41 \cdot 10^{-9}$                 |
| 200               | 1.00                  | 0.632±0.005                       | 1.393±0.006 | 1.013±0.005              | $0.44 \cdot 10^{-14}$                |
| 250               | 1.25                  | 0.790±0.006                       | 1.704±0.006 | 1.247±0.006              | $0.66 \cdot 10^{-18}$                |
| 300               | 1.50                  | 0.962±0.007                       | 2.142±0.005 | 1.552±0.006              | $0.54 \cdot 10^{-21}$                |
| 350               | 1.75                  | 1.073±0.009                       | 2.410±0.007 | 1.742±0.008              | $0.45 \cdot 10^{-24}$                |
| 400               | 2.00                  | 1.311±0.010                       | 2.682±0.009 | 1.996±0.010              | $0.14 \cdot 10^{-37}$                |
| 450               | 2.25                  | 1.549±0.012                       | 2.950±0.011 | 2.250±0.011              | $0.59 \cdot 10^{-53}$                |
| 500               | 2.50                  | 1.788±0.011                       | 3.215±0.013 | 2.503±0.012              | $0.81 \cdot 10^{-69}$                |

“Branch length (T)” and “drift time ( $\tau$ )” were directly set in the simulation process, other parameters were calculated based on the simulation outcome (average from 100 simulations for each value are presented in the table).
