# Supplementary material for: Incomplete Lineage Sorting and Hybridization Statistics for Large-Scale Retroposon Insertion Data
Source: PubMed Central journal article supplement (PMC4788455; doi:10.1371/journal.pcbi.1004812), 2016-03-11
Supplement: pcbi.1004812.s005.pdf [file pcbi.1004812.s005.pdf]

**Supplementary Table S9:** Comparative presentation of strategies to evaluate the reliability of relationships based on presence/absence data.

| targets             | markers   | phylogeny                                                      | KKSC tree (P)                  | Waddell (P) | PAUP_Dollo (bootstrap) | MrBayes (bootstrap) | Chi-square (P)       |
|---------------------|-----------|----------------------------------------------------------------|--------------------------------|-------------|------------------------|---------------------|----------------------|
| <b>Lagomorpha</b>   | 3:0:0     | rabbit<br>+hare<br>-red rock hare<br>-pika                     | 0.0370*                        | 0.0370*     | 100*                   | 62                  | 0.0497*<br>(0.2528)  |
| <b>Landbirds</b>    | 2:0:0     | zebra finch<br>+gulls<br>-stork<br>-chicken                    | 0.1111                         | 0.1111      | 100*                   | -                   | 0.1353<br>(0.5698)   |
| <b>Marsupials</b>   | 1:0:0     | marsupial mole<br>+bandicoot<br>-kangaroo<br>-monito del monte | 0.3333                         | 0.3333      | 100*                   | -                   | 0.3679<br>(0.8825)   |
| <b>Rodentia</b>     | 8:2:0     | mouse<br>+guinea pig<br>-squirrel<br>(-rabbit)                 | 0.0034*                        | na          | 97.5*                  | 82                  | 0.0055*<br>(0.0199*) |
| <b>Carnivora</b>    | 192:74:60 | walrus<br>+ferret<br>-polar bear<br>-dog                       | 3e-21*                         | na          | 100*                   | 100*                | 1e-36*               |
| <b>Musteloidea</b>  | 3:1:0     | raccoon<br>+ferret<br>-red panda<br>-walrus                    | 0.1111                         | 0.0617      | 84                     | -                   | 0.1737<br>(0.4577)   |
| <b>Placentalia</b>  | 9:8:5     | human<br>+elephant<br>-armadillo<br>-opossum                   | 0.2930                         | na          | 56                     | -                   | 0.5537               |
| <b>Wu 1991</b>      | 27:13:0   | example 1                                                      | 2e-4* (hyb.)<br>0.0385* (tree) | na          | 100*                   | 99*                 | 1.15e-6*             |
| <b>Waddell 2010</b> | 50:8:6    | example 2                                                      | 2e-13*                         | na          | 100*                   | 100*                | 1e-38                |

The KKSC test was applied corresponding to the presented new calculations ([http://retrogenomics.uni-muenster.de:3838/KKSC\\_significance\\_test/](http://retrogenomics.uni-muenster.de:3838/KKSC_significance_test/)). The cumulative P values of Waddell were taken from Waddell et al. 2001 (their Table 3). PAUP was used to reconstruct split support values (bootstrap) using the version PAUP\*4.0b10 and the irrev.up option of character transformation. MrBayes v3.2.5 was used to calculate Bayesian support values for branch points using the standard discrete model (binary) and ctype irreversible. Finally, a classical Chi-square test was applied to calculate P-values. For small numbers, we performed the Yates correction (P-value in brackets). All examples are described in in the main body of the text. Lagomorpha 3:0:0 describes three different hypotheses favoring a close relationship between Orytolagus+Lepus to the exclusion of Pronolagus and Ochotona. Examples 1 and 2 are conceived cases to demonstrate the KKSC statistics in special relationships (e.g., under hybridization). Asterisks denote significant splits.

### **References:**

Swofford DL. 2002. PAUP\*: phylogenetic analysis using parsimony (\*and other methods. 4.0b10 ed. Sunderland (MA): Sinauer Associates, Inc.

Ronquist F, Teslenko M, van der Mark P, Ayres DL, Darling A, Höhna S, Larget B, Liu L, Suchard MA, Huelsenbeck JP 2012. MrBayes 3.2: efficient Bayesian phylogenetic inference and model choice across a large model space. Syst Biol. 61:539–542.
